# Supplementary material for: Gold-loaded microspheres via carbosilane–thioether dendrimers as stabilizers and their performance in layer-controllable photonic crystals
Source: Royal Society of Chemistry journal article supplement (doi:10.1039/c8nr05528a), 2018-01-01
Supplement: c8nr05528a1.pdf [file c8nr05528a1.pdf]

Gold-loaded microspheres via carbosilane-thioether dendrimers as stabilizer and their performance in layer-controllable photonic crystals

Yu-Long Tong, Zhijie Zhu, Gang Peng, Tingting Cui and Su Chen\*

State Key Laboratory of Materials-Oriented Chemical Engineering and College of Chemical Engineering, Jiangsu Key Laboratory of Fine Chemicals and Functional Polymer Materials, Nanjing Tech University, 5 Xin Mofan Road, Nanjing 210009, P. R. China.

## Supplementary Figures

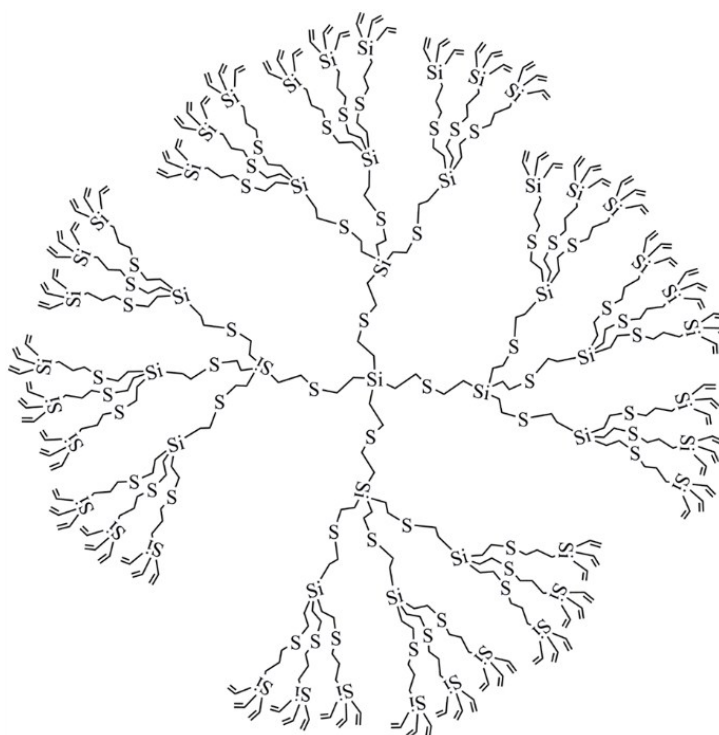

**Fig S1.** Chemical formula of third generation carbosilane-thioether vinyl-terminated (G3-Vi) dendrimer

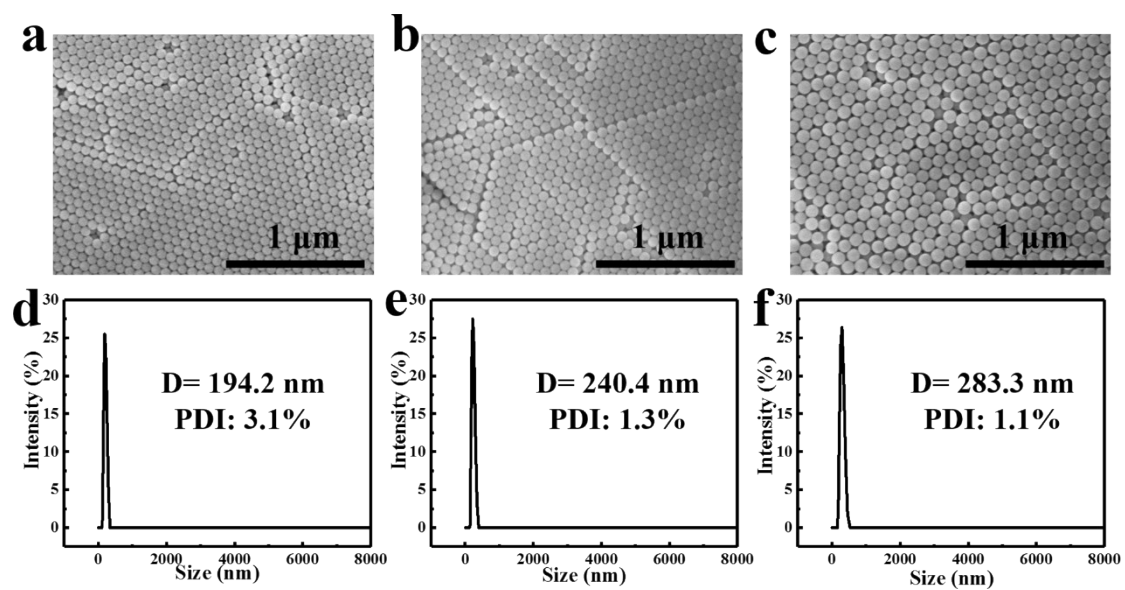

**Fig S2.** SEM images and size distribution curves of P(St-co-G3Vi) microspheres with diameters of 194.2 nm (a, c), 240.4 nm (b, e), 283.3 nm (c, f).

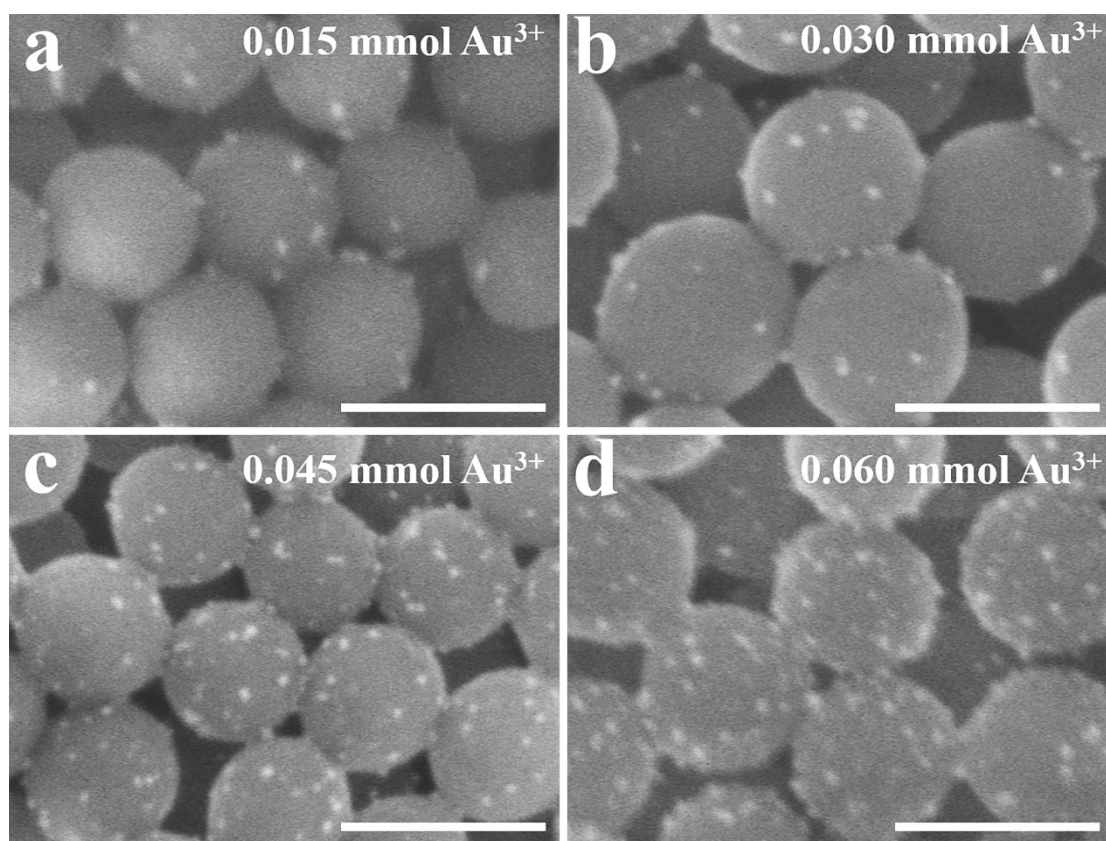

**Fig S3.** SEM images of P(St-co-G3Vi)/Au microspheres with different amount of Au<sup>3+</sup>. Scale bar: 200 nm.

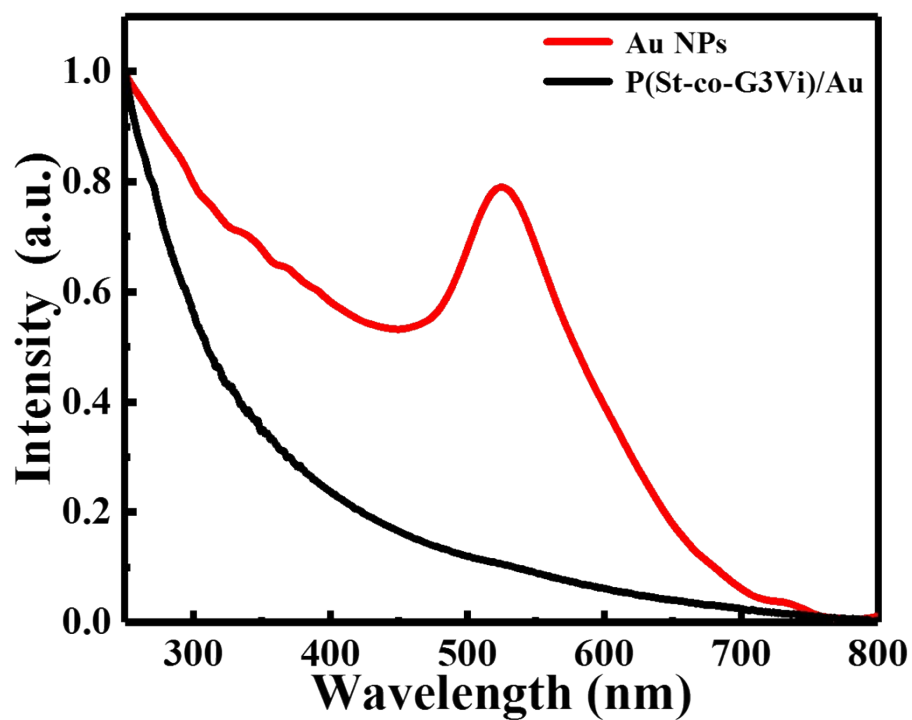

**Fig S4.** UV-vis spectra of Au nanoparticles and P(St-co-G3Vi) microspheres.

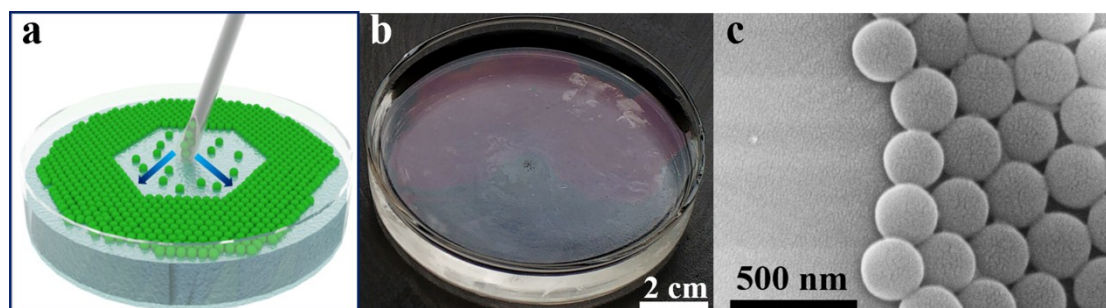

**Fig S5.** (a) Schematic illustration of Langmuir-Blodgett method. (b) Optical photograph of 2D monolayer PC on the surface of water. (c) Cross-sectional SEM image of 2D monolayer PC assembled with P(St-co-G3Vi) microspheres.

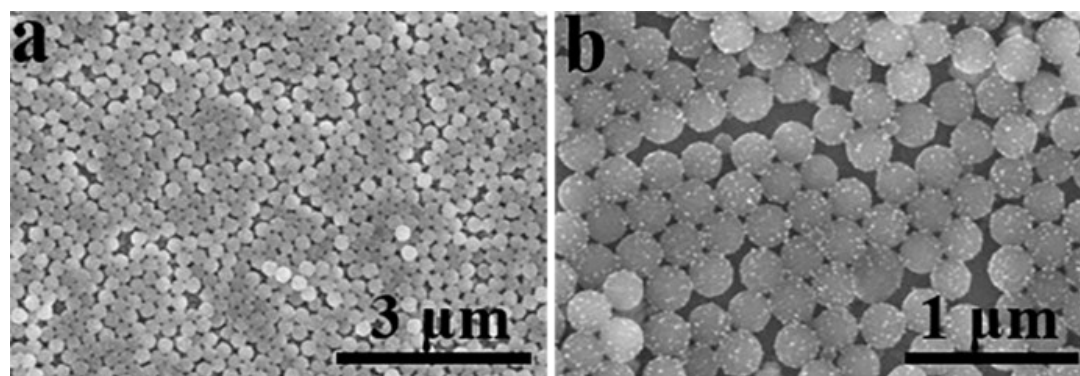

**Fig S6.** SEM images of 2D monolayer PC assembled with P(St-co-G3Vi)/Au

composite microspheres.

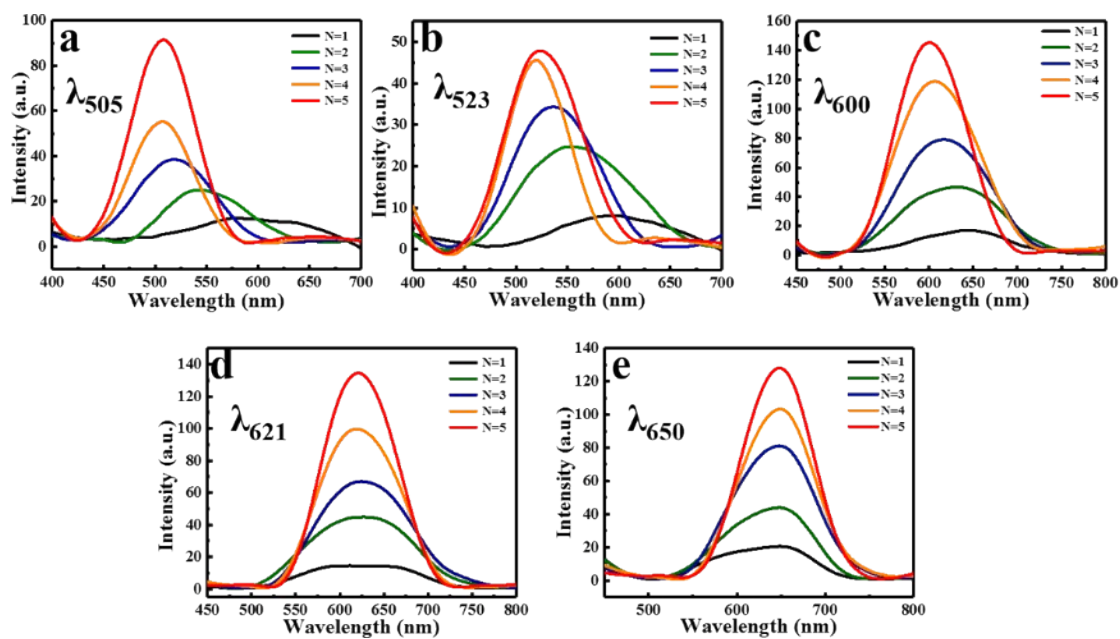

**Fig S7.** Reflection spectra of various layer-number PC at wavelength of 505 nm (a), 523 nm (b), 600 nm (c), 621 nm (d) and 650 nm (d).

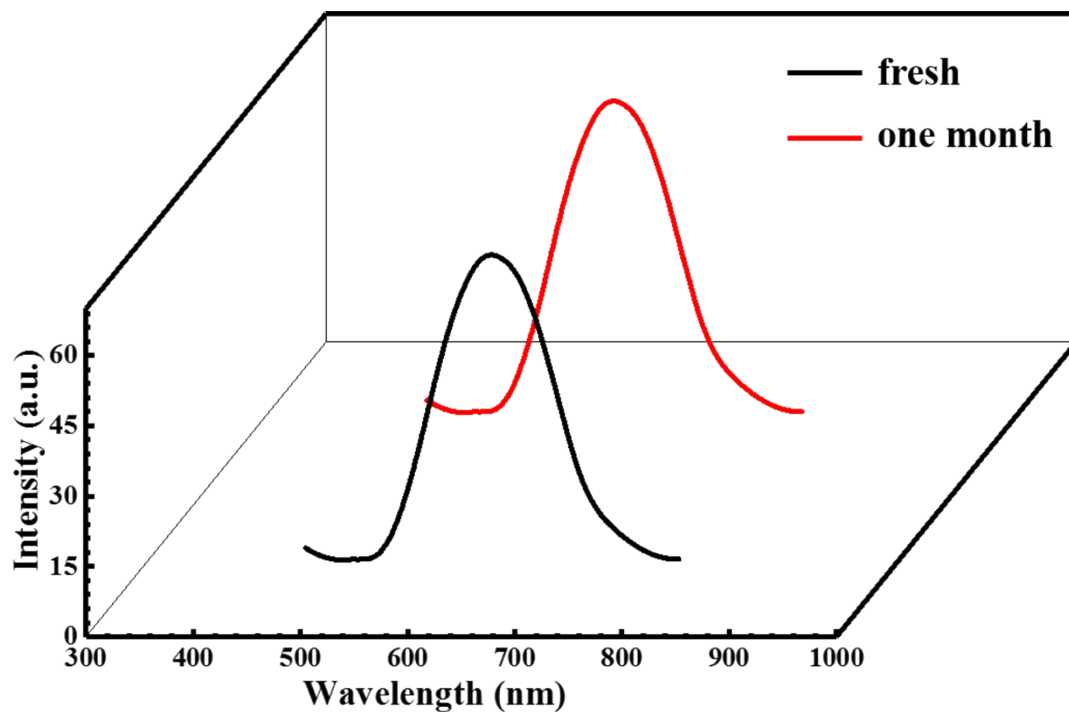

**Fig S8.** Reflection spectra of fresh PC film constructed with P(St-co-G3Vi)/Au microspheres and stored for one month

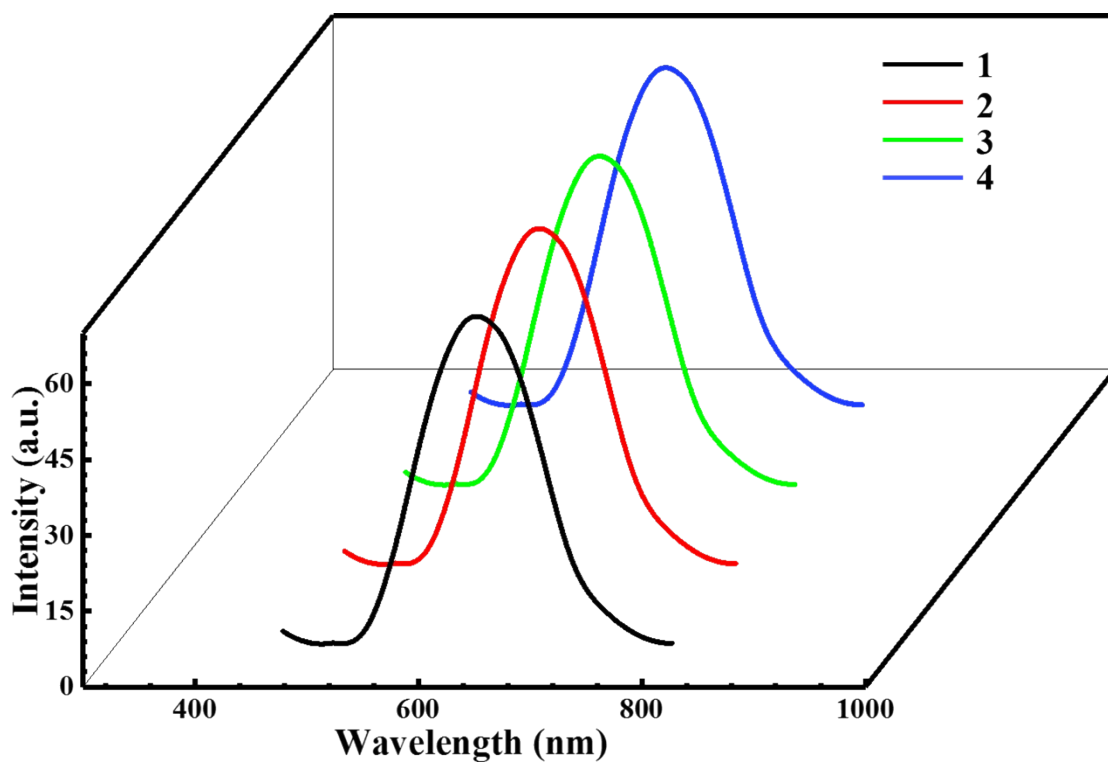

**Fig S9.** Reflection spectra of PC films constructed with same P(St-co-G3Vi)/Au microspheres by combining Langmuir-Blodgett method and layer-by-layer strategy in different batches.

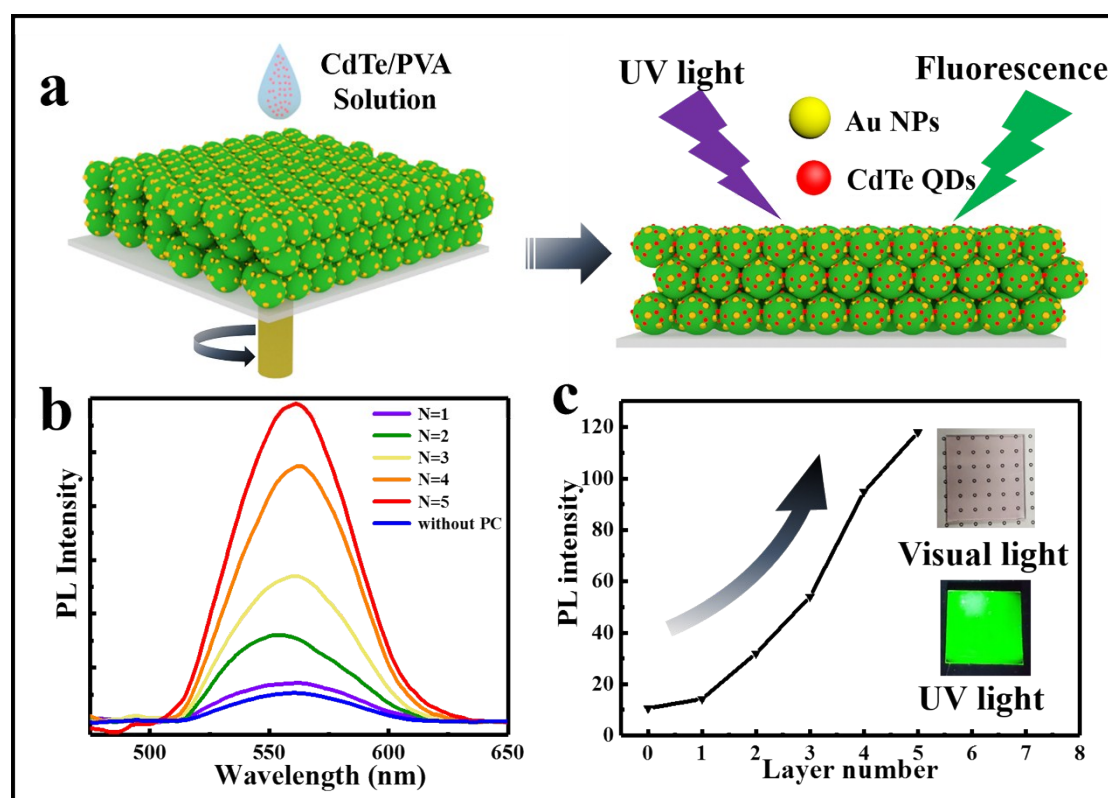

**Fig S10.** (a) Schematic illustration of construction of QD/PC heterogeneous film. (b) PL spectra of various heterogeneous film with different stacking numbers. (c) The correlation between PL intensity and layer numbers, insets: Optical photographs of the heterogeneous film under visual light and UV light.
